# Supplementary material for: Reduced RNA turnover as a driver of cellular senescence
Source: Life Sci Alliance. 2021 Jan 14;4(3):e202000809. doi: 10.26508/lsa.202000809 (PMC7812316; doi:10.26508/lsa.202000809)
Supplement: Supplementary file 3 [file LSA-2020-00809_TableS2.xlsx]

## Sheet: Sup table
Sup. Table 2: ES cells ExoSC3 KO vs WT
KEGG 2019 Mouse on genes upregulated more than 2-fold (averaged from 2 experiments).
Term	Overlap	P-value	Adjusted P-value	Odds Ratio	Combined Score	Genes
p53 signaling pathway	33/71	1.664e-09	5.04192e-07	2.89859	58.5922	CDKN1A;SERPINE1;PTEN;RCHY1;PPM1D;THBS1;BBC3;CCND2;SESN3;ZMAT3;PERP;SESN2;PMAIP1;SFN;GTSE1;RPRM;APAF1;GADD45B;SIVA1;CDKN2A;IGFBP3;SHISA5;TRP73;SIAH1B;GADD45G;RRM2B;TRP53;CCNG1;MDM2;FAS;BAX;MDM4;BCL2L1
ECM-receptor interaction	30/83	6.54315e-06	0.000991287	2.25411	26.9075	LAMA5;ITGB5;SDC4;LAMC3;ITGB4;LAMA3;LAMC2;THBS1;THBS3;COMP;ITGB8;ITGAV;ITGA4;LAMB3;ITGA3;ITGA1;LAMB1;NPNT;HSPG2;COL1A1;COL2A1;COL4A2;COL4A1;COL6A2;COL6A1;ITGA8;COL6A4;COL9A1;COL6A5;CD44
Basal cell carcinoma	22/63	0.000192578	0.0194503	2.17778	18.6309	APC2;FZD1;TCF7L2;CDKN1A;WNT10A;GADD45B;WNT7B;WNT5A;WNT8A;WNT8B;FZD8;FZD10;WNT9A;GLI3;GADD45G;WNT6;TRP53;DVL3;BAX;POLK;WNT3;WNT4
Focal adhesion	50/199	0.000614498	0.0465483	1.56692	11.5869	FLT1;ITGB5;LAMC3;ITGB4;PTEN;ILK;LAMC2;ACTB;MYLK3;COMP;CCND2;KDR;CAPN2;ITGB8;ITGAV;VAV3;PDGFRA;ITGA4;ITGA3;ITGA1;PRKCA;COL2A1;COL4A2;COL4A1;COL6A2;COL6A1;COL6A4;ITGA8;COL6A5;MYL9;LAMA5;ROCK2;LAMA3;PIK3R3;THBS1;EGFR;THBS3;PAK6;FLNB;FLNC;PAK3;JUN;LAMB3;CAV2;VEGFC;PARVA;LAMB1;COL1A1;COL9A1;ZYX
Breast cancer	38/147	0.00150313	0.0910894	1.61212	10.4791	RB1;NOTCH3;CDKN1A;ARAF;PTEN;WNT8A;PIK3R3;WNT8B;FZD10;FGF1;DLL1;EGFR;WNT6;HEY2;FGF20;TNFSF11;DVL3;POLK;WNT3;WNT4;FZD1;JAG2;APC2;TCF7L2;WNT10A;JUN;JAG1;GADD45B;WNT7B;WNT5A;FZD8;WNT9A;FOS;GADD45G;RPS6KB1;TRP53;FGF18;BAX
Small cell lung cancer	26/92	0.00211196	0.106654	1.76245	10.8569	RB1;LAMA5;CDKN1A;LAMC3;LAMA3;PTEN;PIK3R3;LAMC2;PTGS2;FHIT;ITGAV;POLK;CDKN2B;APAF1;LAMB3;GADD45B;ITGA3;LAMB1;GADD45G;TRAF4;COL4A2;COL4A1;TRP53;RARB;BAX;BCL2L1
Gastric cancer	37/150	0.00407702	0.176477	1.5383	8.46433	RB1;CDKN1A;ARAF;WNT8A;PIK3R3;WNT8B;FZD10;FGF1;EGFR;WNT6;FGF20;DVL3;POLK;ABCB1B;WNT3;WNT4;FZD1;APC2;TCF7L2;TGFB2;WNT10A;CDKN2B;GADD45B;CDX2;WNT7B;WNT5A;FZD8;WNT9A;TGFBR1;GADD45G;TGFBR2;RPS6KB1;TRP53;FGF18;RARB;BAX;FGFR2
Wnt signaling pathway	38/160	0.00709508	0.268726	1.48114	7.32918	INVS;CAMK2D;ROCK2;CAMK2A;WNT8A;WNT8B;FZD10;PRICKLE1;CXXC4;WNT6;PPP3CA;CCND2;SOX17;DVL3;GPC4;MAP3K7;WNT3;WNT4;FZD1;APC2;TCF7L2;WNT10A;JUN;WNT7B;WNT5A;FZD8;PRKCA;NFATC1;SIAH1B;WNT9A;DKK1;VANGL1;FOSL1;PLCB4;TRP53;ROR1;PLCB1;PPARD
Melanogenesis	26/100	0.00713899	0.240346	1.62145	8.01352	CAMK2D;CAMK2A;WNT8A;WNT8B;ADCY2;FZD10;ADCY5;WNT6;CREB3L1;DVL3;WNT3;WNT4;FZD1;TCF7L2;WNT10A;EDN1;WNT7B;WNT5A;FZD8;PRKCA;WNT9A;POMC;CREB3;PLCB4;KITL;PLCB1
Arrhythmogenic right ventricular cardiomyopathy (ARVC)	20/72	0.00800772	0.242634	1.73232	8.36252	DSP;TCF7L2;ITGB5;ITGA4;ITGB4;ITGA3;CACNA2D1;ITGA1;ACTB;CACNG6;GJA1;CDH2;SGCB;LMNA;ITGA8;ITGB8;ITGAV;CACNA1S;EMD;DSC2
KEGG 2019 Mouse on genes downregulated more than 2-fold (averaged from 2 experiments).
Term	Overlap	P-value	Adjusted P-value	Odds Ratio	Combined Score	Genes
Cell cycle	46/123	6.50357e-10	1.97058e-07	2.51333	53.1658	PCNA;HDAC1;BUB1B;PKMYT1;CCNB2;CCND3;CCNB1;CDC45;PTTG1;ORC1;YWHAQ;CHEK2;MYC;CHEK1;ABL1;E2F1;E2F2;E2F3;SKP2;SKP1A;BUB1;TGFB1;SMAD3;PLK1;CDC7;CDC6;CDC25C;CDC25A;CCNA2;MAD2L2;WEE1;CDK6;TFDP1;RBL1;DBF4;CCNE2;ESPL1;CCNE1;CDK2;CDK1;MCM3;MCM4;ANAPC5;MCM6;ANAPC1;MAD2L1
Glycolysis / Gluconeogenesis	29/67	2.08958e-08	3.16572e-06	2.90884	51.4392	ADPGK;ENO1;ENO2;ENO3;HK2;HK1;GPI1;ALDH3B2;LDHA;ALDH1B1;ALDH3B1;PGK1;PGM2;DLAT;ACSS1;PGM1;PCK2;TPI1;PDHA1;PGAM1;GCK;MINPP1;ALDH3A1;PFKL;ALDOC;ALDOA;PFKM;PFKP;ALDH9A1
DNA replication	19/35	6.56385e-08	6.62949e-06	3.64823	60.3385	FEN1;RNASEH2B;RFC3;RNASEH2A;PCNA;LIG1;RFC1;RFC2;RPA1;RPA2;POLD3;POLE4;POLA2;POLE2;POLD2;MCM3;MCM4;MCM6;DNA2
Cellular senescence	56/185	7.09606e-08	5.37526e-06	2.03429	33.4868	H2-T22;H2-BL;H2-K1;PIK3CD;CCND3;PPP3CC;CHEK2;MYC;CHEK1;MYBL2;CAPN1;MAP2K3;MAP2K1;H2-T10;TSC1;H2-T3;CDC25A;CCNA2;RBL1;MRAS;CCNE2;CCNE1;VDAC3;VDAC2;VDAC1;SLC25A5;SLC25A4;PPID;H2-M3;H2-Q7;ITPR3;H2-Q2;ZFP36L2;CCNB2;CCNB1;RRAS;RBBP4;E2F1;E2F2;E2F3;MAP2K6;MAPK3;HIPK4;TGFB1;SMAD3;MRE11A;MAPK12;NFATC4;MAPK13;MAPK11;CDK6;CDK2;CDK1;CALM3;CALM2;H2-Q10
Oocyte meiosis	38/116	1.01252e-06	6.1359e-05	2.20152	30.3877	CAMK2B;ADCY3;ITPR3;ADCY1;PKMYT1;ADCY6;AURKA;CCNB2;RPS6KA6;CCNB1;SLK;PPP3CC;PTTG1;PPP2R1B;YWHAQ;RPS6KA2;FBXO5;SKP1A;BUB1;MAPK3;MAP2K1;PLK1;PPP2R5A;PPP2R5C;CDC25C;MAPK12;MAD2L2;CCNE2;STAG3;ESPL1;CCNE1;CDK2;CDK1;ANAPC5;CALM3;CALM2;ANAPC1;MAD2L1
Human T-cell leukemia virus 1 infection	62/245	1.24652e-05	0.000629491	1.70068	19.2051	H2-T22;H2-BL;H2-K1;BUB1B;PIK3CD;TNFRSF13C;ITGAL;ELK1;ETS2;CCND3;PPP3CC;CREB3L3;PTTG1;CHEK2;MYC;CHEK1;TSPO;MAP2K1;H2-T10;H2-T3;CCNA2;KAT2B;CCNE2;ESPL1;CCNE1;VDAC3;VDAC2;VDAC1;ANAPC5;TLN2;SLC25A5;SLC25A4;ANAPC1;ATF4;H2-DMA;H2-M3;H2-Q7;ADCY3;H2-Q2;ADCY1;ADCY6;CCNB2;E2F1;E2F2;E2F3;MAPK3;STAT5A;STAT5B;RANBP1;FDPS;MAP3K1;TGFB1;SMAD3;NFATC4;NFKBIA;CDK2;CALR;TCF3;H2-Q10;RAN;MAD2L1;H2-AB1
Mismatch repair	12/22	1.72705e-05	0.000747566	3.66569	40.1998	POLD3;MSH6;RFC3;PCNA;LIG1;RFC1;MSH2;RFC2;EXO1;POLD2;RPA1;RPA2
One carbon pool by folate	11/19	1.83873e-05	0.000696418	3.89078	42.4244	DHFR;ATIC;MTHFD1L;SHMT2;MTHFD2;SHMT1;MTHFR;MTR;TYMS;ALDH1L2;GART
Pathways in cancer	115/535	2.08807e-05	0.000702982	1.44458	15.5678	ELK1;FGF3;FGF4;FRAT1;CCND3;FRAT2;MYC;PIM1;SKP2;PDGFRB;MAP2K1;RALBP1;WNT5B;DAPK2;EML4;MSH6;MSH2;SMO;CCNE2;IL23A;CCNE1;IL6ST;EPAS1;NOTCH4;GSTT3;GSTT2;GSTT1;RASGRP2;STK4;RASGRP1;HSP90B1;ABL1;PLCG1;FGF21;STAT5A;GSTM3;STAT5B;FZD3;TGFB1;SMAD3;FZD5;FZD4;PTCH1;FZD9;FN1;PTK2;FGF17;NFKBIA;BMP4;FGF15;CDK6;LPAR5;CDK2;CALM3;GNB5;CALM2;FGFR3;NFE2L2;HSP90AB1;FLT4;PIK3CD;BRCA2;GLI2;CASP9;GNGT2;HEY1;SKP1A;ARHGEF1…
Progesterone-mediated oocyte maturation	29/90	2.64119e-05	0.000800282	2.16547	22.8277	HSP90AB1;PIK3CD;ADCY3;ADCY1;PKMYT1;ADCY6;AURKA;CCNB2;RPS6KA6;CCNB1;RPS6KA2;BUB1;MAPK3;HSP90AA1;MAP2K1;PLK1;KIF22;CDC25C;CDC25A;MAPK12;MAPK13;CCNA2;MAD2L2;MAPK11;CDK2;CDK1;ANAPC5;ANAPC1;MAD2L1
GO Cellular components on genes downregulated more than 2-fold (averaged from 2 experiments).
Term	Overlap	P-value	Adjusted P-value	Odds Ratio	Combined Score	Genes
mitochondrion (GO:0005739)	215/1027	5.36685e-08	2.39361e-05	1.40691	23.5522	TDRKH;PANK2;GLDC;ECI2;NUDT1;CISD1;ABAT;GHITM;GCSH;RPS6KA6;LONP1;PDK3;FBXO7;GLUL;PDK1;MCCC2;GSTK1;STARD4;GABARAPL1;CPT1A;STARD5;ACSL1;CMC1;ACSL5;BCS1L;CPT1B;GCAT;AFG3L2;NIF3L1;COX7A2L;KARS;MTHFD2;BOLA3;SUCLG2;VDAC2;VDAC1;DNA2;PTGES;PIF1;SHMT2;STXBP1;MRPL14;XPC;MRPL15;MRPL12;LIAS;PRDX3;CYP27B1;PTPMT1;GRPEL2;PCK2;MRPL28;PYCR1;PYCR2;MRPL24;BRI3BP;MCAT;PRDX6;DHFR;CS;MRPL30;QARS;ARMC10;ECHDC2;SFXN1;NDU…
mitochondrial matrix (GO:0005759)	77/309	2.22759e-06	0.000496754	1.67467	21.7951	ISCA1;ACAA2;HIBADH;GLDC;GFM2;NUDT1;NUDT2;ABAT;ALDH1L2;GCSH;AUH;ACP6;FPGS;LONP1;PDK3;ACADM;DLAT;ACADS;HIBCH;PDK1;IDH3A;MCCC2;GSTK1;NSUN4;DIMT1;GPT2;PUS1;DARS2;COASY;ALDH5A1;KARS;PCCA;MTHFD2;LACTB2;PPIF;SUCLG2;GARS;DNA2;CASQ1;NAT8L;ECHS1;OAT;SHMT2;GLS2;AK4;LIAS;TYMS;HSD17B10;ACAT1;HSPD1;PRDX3;CCNB1;NFS1;MTHFD1L;PITRM1;ALDH1B1;CYP11A1;IARS2;ACSS1;PCK2;PDHA1;MMAB;GSR;IDH2;PYCR1;PYCR2;TIMM44;HSPE1;SOD…
microtubule cytoskeleton (GO:0015630)	92/389	2.70664e-06	0.000402387	1.58941	20.3759	CEP57;CLIC4;NUMA1;MAST2;KIF14;SEPT9;TUBA1B;SEPT6;TUBB3;DPYSL2;KIF13B;FLOT1;CEP250;FBXO5;KIF21B;CDK5RAP3;DLGAP5;CCT3;CCT2;PRKCI;KIF24;SEPT1;KIF23;NAV1;KCNAB2;KIF22;TUBG1;KIF7;EML1;GTF2F2;TUBA4A;DNM1;EML4;TUBB2B;CLIP1;TUBB2A;KIFC2;PITPNM1;INCENP;DDAH2;CDC42EP4;TCP1;KIF2C;RELL1;KIFC3;KIF20A;MAPT;ARHGEF2;KIF20B;RPP25;TRIM54;KANK4;SHMT2;SLC1A4;KLHL12;PLA2G6;NDRG1;SKA1;AURKB;AURKA;CCNB2;NUAK1;MTA1;KATN…
ficolin-1-rich granule lumen (GO:1904813)	38/124	6.16518e-06	0.000687418	2.05949	24.7068	VCP;PSMD12;HSP90AB1;GMFG;GSTP1;GNS;PNP;PSMD7;CAND1;PSMD2;PSMD3;COTL1;TIMP2;PGM2;CAPN1;LTA4H;CCT8;GUSB;ATG7;PGM1;CTSB;HSPA8;XRCC6;HSP90AA1;PGAM1;PDAP1;MIF;ILF2;DERA;PSMA5;ACLY;PFKL;BIN2;GLB1;IMPDH2;PSMC2;ALDOC;ALDOA
microtubule (GO:0005874)	56/211	7.20241e-06	0.000642455	1.78362	21.12	CEP57;NUMA1;RAB3D;KIF14;SEPT9;TUBA1B;TUBB3;DPYSL2;KIF13B;KIF21B;CDK5RAP3;CCT3;CCT2;KIF24;KIF23;KIF22;KCNAB2;TUBG1;KIF7;TUBA4A;TUBB2B;CLIP1;TUBB2A;KIFC2;TCP1;KIF2C;KIF20A;MAPT;ARHGEF2;KIFC3;KIF20B;TRIM54;HDAC3;ARL3;NDRG1;SKA1;AURKB;AURKA;MTA1;HAUS8;CCT8;KIF3C;CCT7;CCT5;SPAG5;PLK1;TUBE1;TUBB4A;CCT6A;TPPP3;KIF26A;PRC1;CDK1;MAP6D1;CALM3;CALM2
nuclear chromosome part (GO:0044454)	90/393	1.35235e-05	0.00100525	1.53903	17.2542	FEN1;KDM1A;LDB1;EHMT2;MEI4;TONSL;BUB1B;CHD4;BRCA1;BRCA2;CHAF1B;HELB;CHAF1A;EME1;MYC;RUVBL1;POGZ;RCC1;HIST1H1B;WDHD1;TIPIN;PARP1;H2AFY;H2AFZ;DDX11;ACTR5;NCOA3;ACTL6A;TINF2;H2AFX;THOC5;UCHL5;MSH2;WDR82;ZFP42;MCM3;TIMELESS;MCM4;MCM6;DNA2;PIF1;SMARCD3;PCNA;HDAC1;UHRF1;CDCA5;CENPA;NCAPH;AURKB;AURKA;RAD51AP1;POLD3;HIRA;SYCE2;CCNB1;ORC1;RBBP4;NACC2;POLD2;E2F1;MCMBP;BUB1;GINS1;GINS2;XRCC6;SMAD3;POLR3GL;P…
centrosome (GO:0005813)	101/462	3.21575e-05	0.00204889	1.46918	15.1985	BCCIP;CHEK1;CEP250;NEK2;CDK5RAP3;DDX11;CLIP1;CEP57L1;RRAGD;ALPK3;ATF5;KIF20B;ATF4;AKNA;ARL3;SLC1A4;NDRG1;CCNB2;CCNB1;PRKAR2A;CEP70;TCTEX1D2;CEP72;NPHP4;RAB11FIP4;CEP78;RAP1GAP2;NEK6;PLK1;SMAD7;CDK6;HOOK2;CDK2;CCDC88C;MKS1;CDK1;UNC119;TUBGCP6;CALM3;CNTROB;CALM2;MDM1;NFE2L2;CEP57;GPSM2;CLIC4;NUMA1;DIS3L;OLA1;SNX10;CHD4;BRCA2;NUP62;FLOT1;DLGAP5;BCAS2;CTSC;ARHGEF10;LRRC45;H2AFX;HAUS4;PPP2R5A;KIF23;AX…
polymeric cytoskeletal fiber (GO:0099513)	56/222	3.52873e-05	0.00196727	1.69524	17.3796	CEP57;WIPF2;KIF14;SEPT9;TUBA1B;TUBB3;DPYSL2;KIF13B;KIF21B;CDK5RAP3;CCT3;CCT2;ACTN3;TPM2;KIF24;COBL;KIF23;TSC1;KIF22;KCNAB2;TUBG1;KIF7;TUBA4A;HCK;TUBB2B;CLIP1;TUBB2A;KIFC2;TCP1;KIF2C;KIF20A;MAPT;ARHGEF2;KIFC3;KIF20B;EZR;TRIM54;RHOQ;TWF2;WAS;SLC1A4;NDRG1;MTA1;MICAL1;CCT8;KIF3C;CCT7;CCT5;TUBE1;TUBB4A;AIF1L;CCT6A;TPPP3;MYO1B;KIF26A;MAP6D1
cytoplasmic vesicle lumen (GO:0060205)	37/130	4.96586e-05	0.00246086	1.91274	18.9559	ARHGAP9;VCP;PSMD12;PDXK;HSP90AB1;GMFG;GSTP1;HSP90B1;PYCARD;PNP;PSMD7;HSPH1;CAND1;PSMD2;PSMD3;COTL1;PGM2;APOE;CCT8;ATG7;HSPA8;XRCC6;HSP90AA1;PGAM1;MIF;DERA;FGR;PSMA5;PFKL;BIN2;DLC1;IMPDH2;PSMC2;HYOU1;ALDOC;CALR;ALDOA
microtubule organizing center (GO:0005815)	105/508	0.000229653	0.0102425	1.38907	11.6389	BCCIP;CHEK1;CEP250;NEK2;CDK5RAP3;DDX11;CLIP1;CEP57L1;RRAGD;ALPK3;ATF5;KIF20B;RPP25;ATF4;AKNA;ARL3;SLC1A4;KLHL12;PLA2G6;NDRG1;CCNB2;CCNB1;PRKAR2A;CEP70;TCTEX1D2;CEP72;NPHP4;RAB11FIP4;CEP78;RAP1GAP2;ABCA2;NEK6;PLK1;NR0B1;SMAD7;TPX2;CDK6;HOOK2;CDK2;CCDC88C;MKS1;CDK1;UNC119;TUBGCP6;CALM3;CNTROB;CALM2;MDM1;NFE2L2;CEP57;GPSM2;CLIC4;NUMA1;DIS3L;OLA1;SNX10;CHD4;BRCA2;NUP62;FLOT1;DLGAP5;BCAS2;CTSC;ARHGEF1…
